# Supplementary material for: Novel Cerium(IV) Coordination Compounds of Monensin and Salinomycin
Source: MDPI journal article supplement (doi:10.3390/molecules28124676), 2023-06-09
Supplement: s1 [file s1]

# Novel Cerium(IV) Coordination Compounds of Monensin and Salinomycin

Nikolay Petkov <sup>1,\*</sup>, Ivayla Pantcheva <sup>1,\*</sup>, Anela Ivanova <sup>1</sup>, Radostina Stoyanova <sup>2</sup>, Rositsa Kukeva <sup>2</sup>,  
Radostina Alexandrova <sup>3</sup>, Abedullkader Abudalleh <sup>3</sup> and Petar Dorkov <sup>4</sup>

<sup>1</sup> Faculty of Chemistry and Pharmacy, Sofia University St. Kliment Ohridski, 1164 Sofia, Bulgaria; aivanova@chem.uni-sofia.bg

<sup>2</sup> Institute of General and Inorganic Chemistry, Bulgarian Academy of Sciences, 1113 Sofia, Bulgaria; radstoy@svr.igic.bas.bg (R.S.); rositsakukeva@yahoo.com (R.K.)

<sup>3</sup> Institute of Experimental Morphology, Pathology and Anthropology with Museum, Bulgarian Academy of Sciences, 1113 Sofia, Bulgaria; rialexandrova@hotmail.com (R.A.); alkader78mah@yahoo.com (A.A.)

<sup>4</sup> Research and Development Department, Biovet Ltd., 4550 Peshtera, Bulgaria; p\_dorkov@abv.bg

\* Correspondence: ahnp@chem.uni-sofia.bg (N.P.); ipancheva@chem.uni-sofia.bg (I.P.);  
Tel.: +359-2-8161446 (N.P. & I.P.)

## Supplementary Information

**Citation:** Petkov, N.; Pantcheva, I.;  
Ivanova, A.; Stoyanova, R.; Kukeva,  
R.; Alexandrova, R.; Abudalleh, A.;  
Dorkov, P. Novel Cerium(IV)  
Coordination Compounds of  
Monensin and Salinomycin.  
*Molecules* **2023**, *28*, 4676.  
[doi.org/10.3390/molecules28124676](https://doi.org/10.3390/molecules28124676)

Academic Editor: Mihaela Badea

Received: 18 May 2023

Revised: 1 June 2023

Accepted: 7 June 2023

Published: 9 June 2023

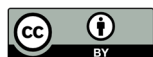

**Copyright:** © 2023 by the authors.  
Licensee MDPI, Basel, Switzerland.  
This article is an open access article  
distributed under the terms and  
conditions of the Creative Commons  
Attribution (CC BY) license  
(<https://creativecommons.org/licenses/by/4.0/>).

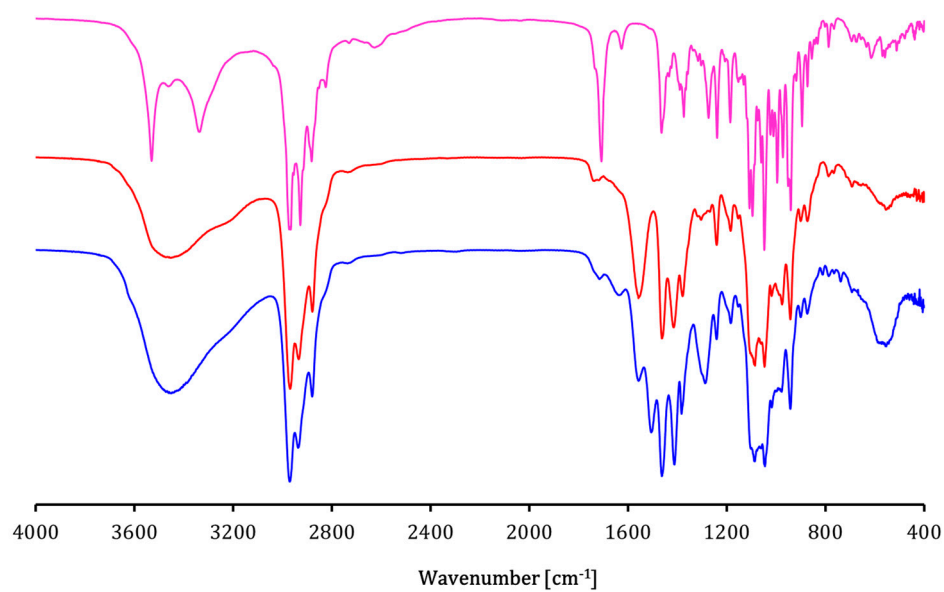

**Figure S1.** IR spectra of monensic acid (magenta), complex **1a** (red) and complex **2a** (blue).

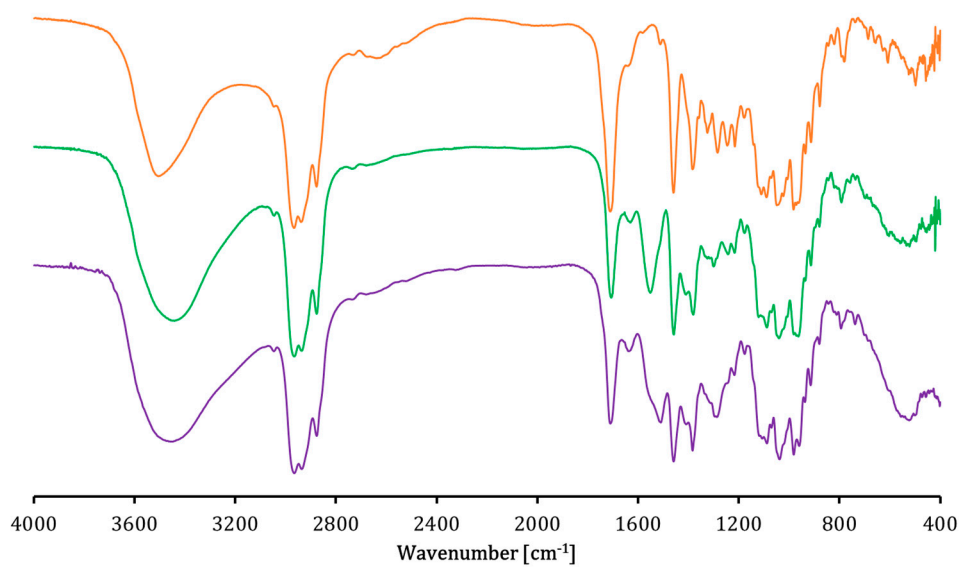

**Figure S2.** IR spectra of salinomycinic acid (orange), complex **1b** (green) and complex **2b** (violet).

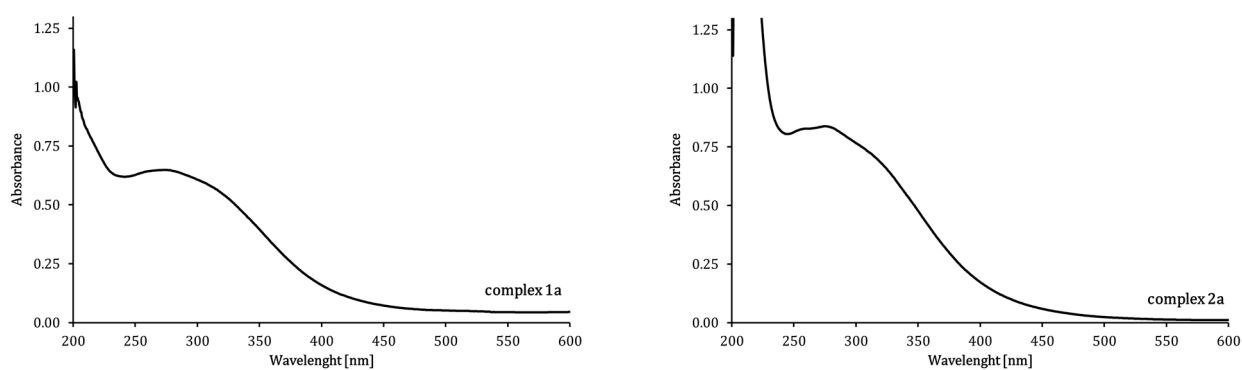

**Figure S3.** UV-Vis spectra of **1a** and **2a** in MeOH at concentration 0.3125 mg/mL.

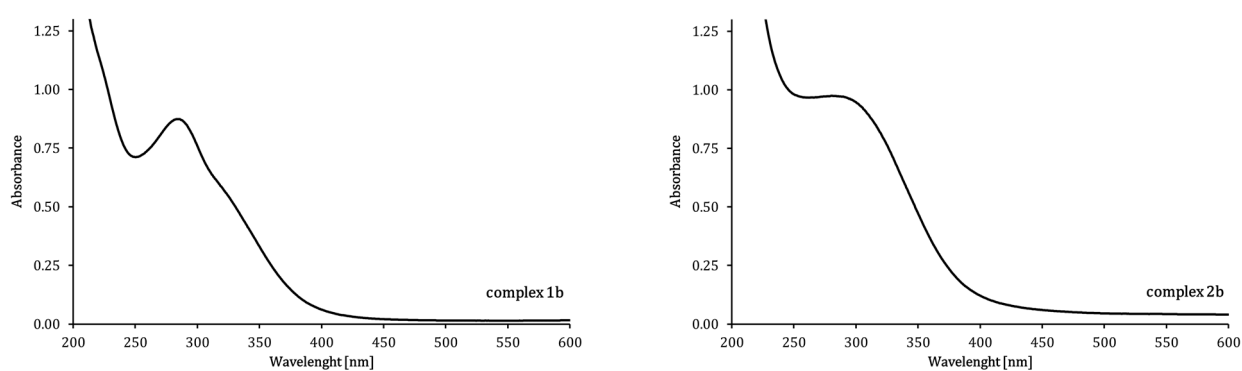

**Figure S4.** UV-Vis spectra of **1b** and **2b** in MeOH at concentration 0.3125 mg/mL.

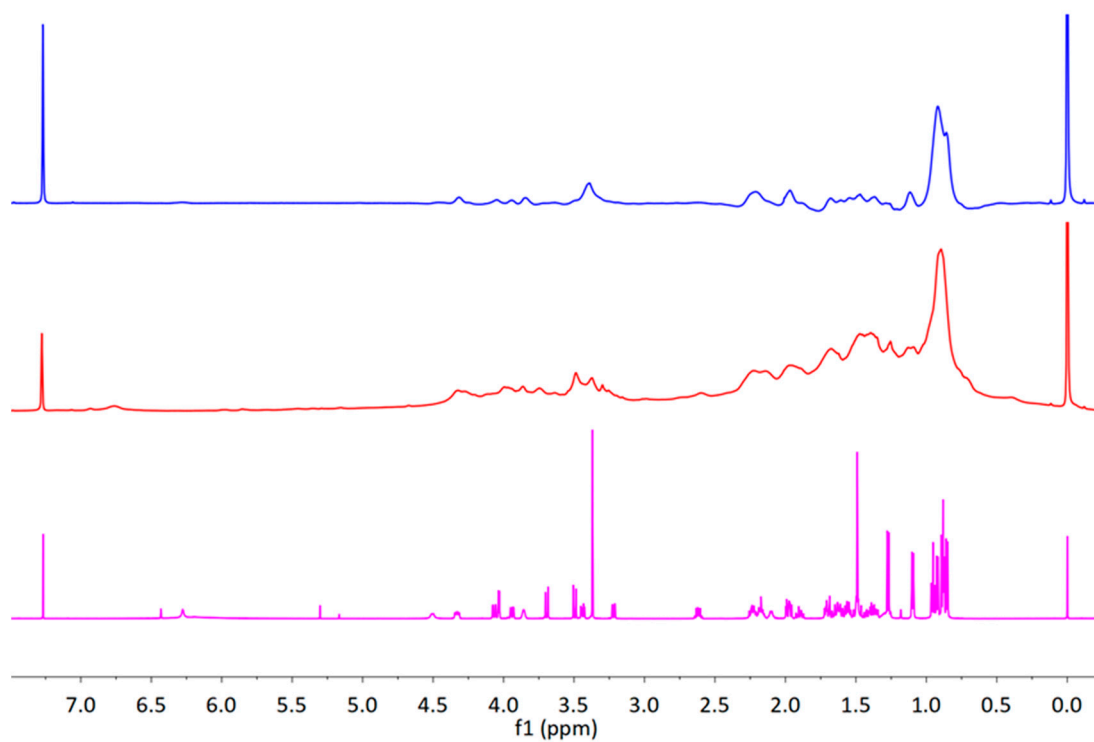

**Figure S5.**  $^1\text{H}$ -NMR spectra of monensic acid (magenta) and complexes **1a** (red) / **2a** (blue).

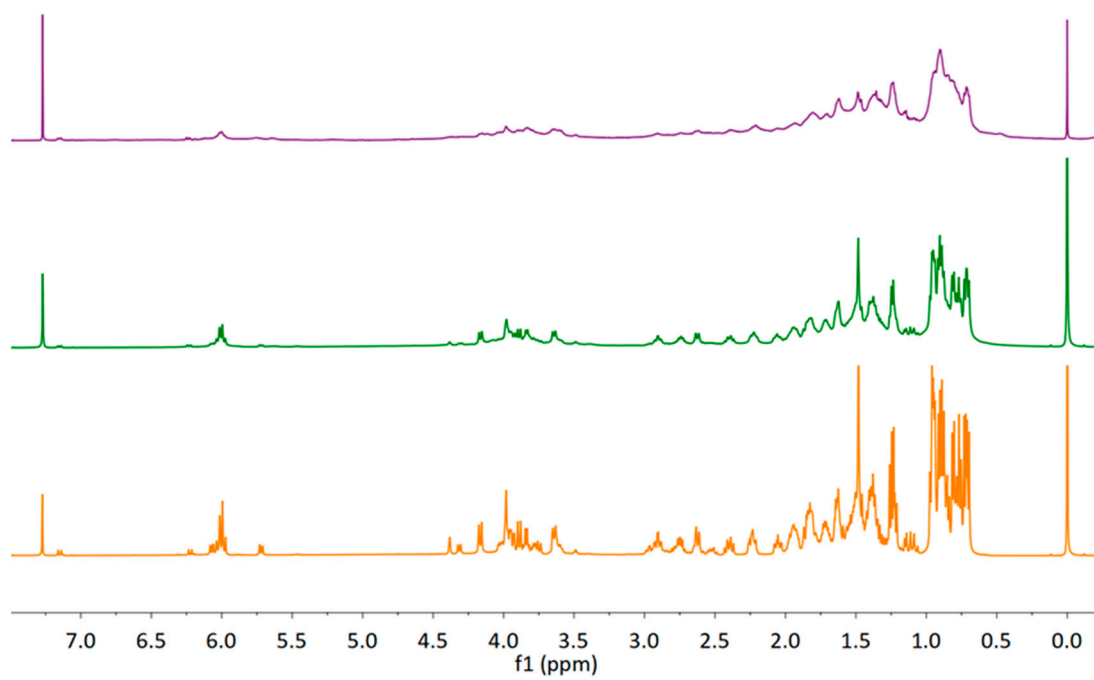

**Figure S6.**  $^1\text{H}$ -NMR spectra of salinomycinic acid (orange) and complexes **1b** (green) / **2b** (purple).

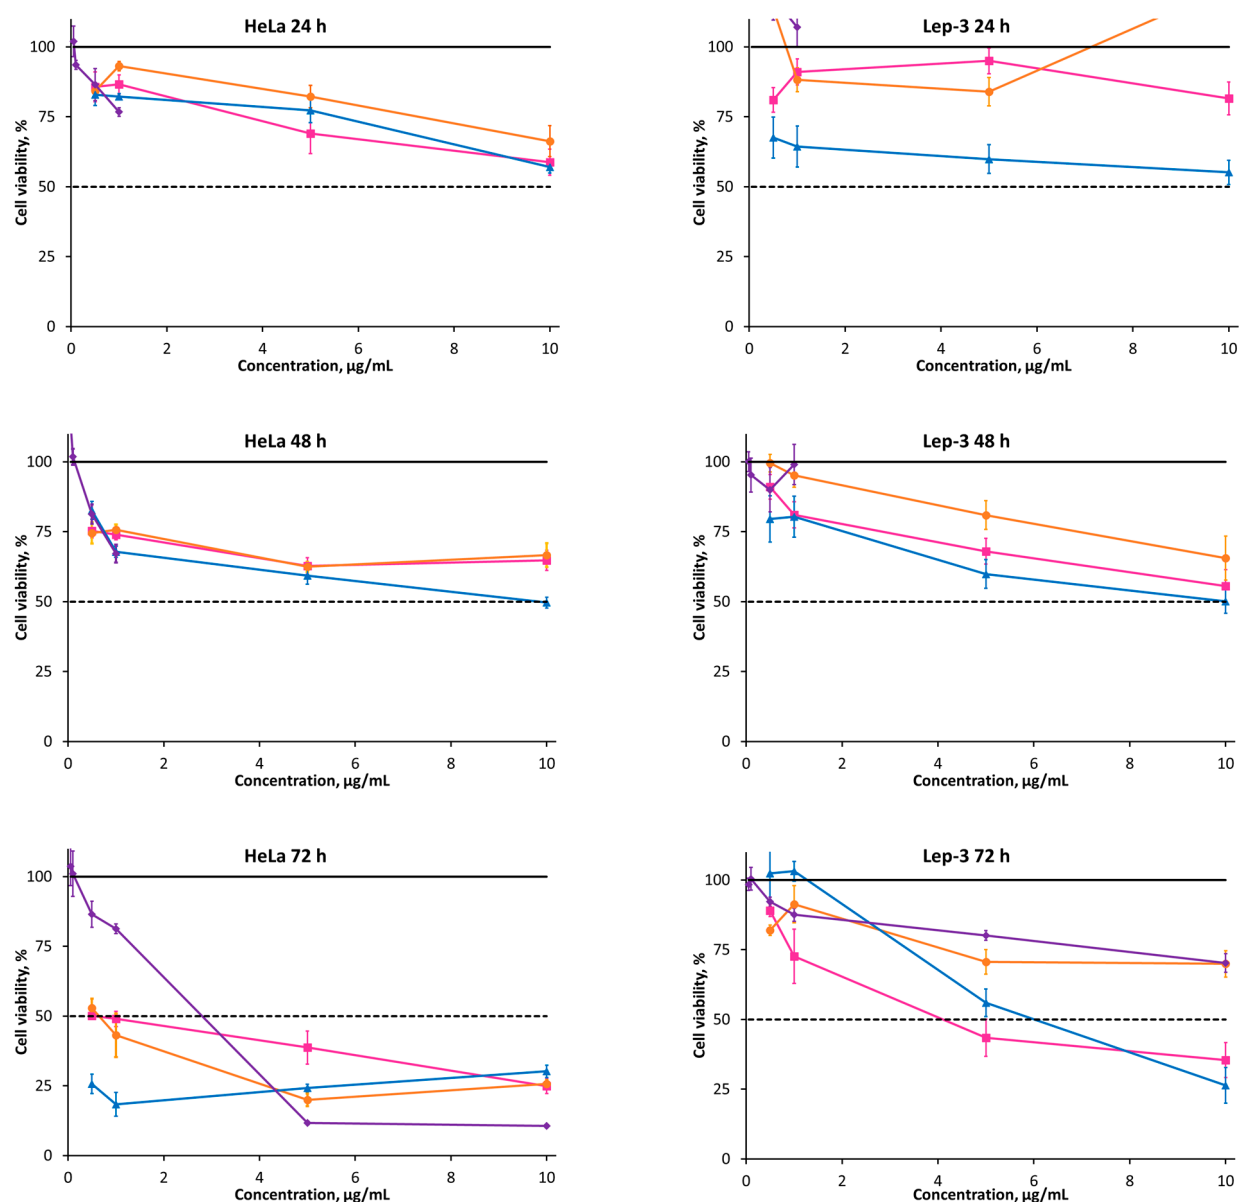

**Figure S7.** Cell viability of (a) HeLa and (b) Lep-3 after 24-72 h treatment with Mon×H<sub>2</sub>O, SalH and complexes **2a-b** (MTT test). Colour code: Mon×H<sub>2</sub>O – magenta, SalH – orange, **2a** – blue, **2b** – purple.

**Table S1.** Coordinates of Monensinate anion.

| <b>Residue<br/>name</b> | <b>Atom number</b> | <b>System<br/>numbering</b> | <b>x</b> | <b>y</b> | <b>z</b> |
|-------------------------|--------------------|-----------------------------|----------|----------|----------|
| 1MNA                    | O1                 | 1                           | -0.223   | 0.21     | 0.133    |
| 1MNA                    | C1                 | 2                           | -0.306   | 0.12     | 0.192    |
| 1MNA                    | O2                 | 3                           | -0.259   | 0.037    | 0.269    |
| 1MNA                    | C2                 | 4                           | -0.457   | 0.133    | 0.171    |
| 1MNA                    | H1                 | 5                           | -0.504   | 0.06     | 0.237    |
| 1MNA                    | C36                | 6                           | -0.504   | 0.273    | 0.215    |
| 1MNA                    | H59                | 7                           | -0.469   | 0.292    | 0.317    |
| 1MNA                    | H60                | 8                           | -0.613   | 0.278    | 0.215    |
| 1MNA                    | H61                | 9                           | -0.464   | 0.349    | 0.148    |
| 1MNA                    | C3                 | 10                          | -0.501   | 0.102    | 0.025    |
| 1MNA                    | H2                 | 11                          | -0.461   | 0.182    | -0.038   |
| 1MNA                    | O11                | 12                          | -0.644   | 0.111    | 0.025    |
| 1MNA                    | C35                | 13                          | -0.7     | 0.155    | -0.098   |
| 1MNA                    | H56                | 14                          | -0.661   | 0.254    | -0.124   |
| 1MNA                    | H57                | 15                          | -0.808   | 0.163    | -0.086   |
| 1MNA                    | H58                | 16                          | -0.679   | 0.085    | -0.178   |
| 1MNA                    | C4                 | 17                          | -0.459   | -0.036   | -0.033   |
| 1MNA                    | H3                 | 18                          | -0.521   | -0.054   | -0.121   |
| 1MNA                    | C34                | 19                          | -0.491   | -0.151   | 0.065    |
| 1MNA                    | H53                | 20                          | -0.48    | -0.247   | 0.015    |
| 1MNA                    | H54                | 21                          | -0.594   | -0.142   | 0.1      |
| 1MNA                    | H55                | 22                          | -0.423   | -0.148   | 0.15     |
| 1MNA                    | C5                 | 23                          | -0.312   | -0.045   | -0.083   |
| 1MNA                    | H4                 | 24                          | -0.247   | -0.038   | 0.004    |
| 1MNA                    | C6                 | 25                          | -0.269   | 0.064    | -0.185   |
| 1MNA                    | H5                 | 26                          | -0.267   | 0.16     | -0.134   |
| 1MNA                    | C33                | 27                          | -0.364   | 0.076    | -0.306   |
| 1MNA                    | H48                | 28                          | -0.379   | -0.021   | -0.352   |
| 1MNA                    | H49                | 29                          | -0.324   | 0.145    | -0.379   |
| 1MNA                    | H50                | 30                          | -0.461   | 0.115    | -0.273   |
| 1MNA                    | C7                 | 31                          | -0.125   | 0.038    | -0.235   |
| 1MNA                    | H6                 | 32                          | -0.102   | 0.107    | -0.316   |
| 1MNA                    | O10                | 33                          | -0.033   | 0.06     | -0.131   |
| 1MNA                    | H52                | 34                          | -0.031   | -0.021   | -0.078   |
| 1MNA                    | C8                 | 35                          | -0.108   | -0.107   | -0.285   |
| 1MNA                    | H7                 | 36                          | -0.003   | -0.126   | -0.305   |
| 1MNA                    | H8                 | 37                          | -0.164   | -0.119   | -0.378   |
| 1MNA                    | O3                 | 38                          | -0.294   | -0.175   | -0.141   |
| 1MNA                    | C9                 | 39                          | -0.161   | -0.208   | -0.183   |
| 1MNA                    | C10                | 40                          | -0.155   | -0.353   | -0.229   |
| 1MNA                    | H9                 | 41                          | -0.067   | -0.37    | -0.29    |
| 1MNA                    | H10                | 42                          | -0.245   | -0.38    | -0.284   |
| 1MNA                    | C11                | 43                          | -0.145   | -0.428   | -0.096   |
| 1MNA                    | H11                | 44                          | -0.092   | -0.523   | -0.107   |
| 1MNA                    | H12                | 45                          | -0.246   | -0.446   | -0.058   |

---

|      |     |    |        |        |        |
|------|-----|----|--------|--------|--------|
| 1MNA | O4  | 46 | -0.087 | -0.202 | -0.061 |
| 1MNA | C12 | 47 | -0.071 | -0.33  | -0.004 |
| 1MNA | C32 | 48 | -0.134 | -0.327 | 0.136  |
| 1MNA | H45 | 49 | -0.086 | -0.251 | 0.196  |
| 1MNA | H46 | 50 | -0.122 | -0.424 | 0.184  |
| 1MNA | H47 | 51 | -0.24  | -0.303 | 0.128  |
| 1MNA | C13 | 52 | 0.081  | -0.361 | 0.008  |
| 1MNA | H13 | 53 | 0.092  | -0.458 | 0.057  |
| 1MNA | C14 | 54 | 0.161  | -0.363 | -0.122 |
| 1MNA | H14 | 55 | 0.144  | -0.454 | -0.179 |
| 1MNA | H15 | 56 | 0.139  | -0.274 | -0.18  |
| 1MNA | C15 | 57 | 0.303  | -0.356 | -0.068 |
| 1MNA | H16 | 58 | 0.367  | -0.307 | -0.141 |
| 1MNA | H17 | 59 | 0.341  | -0.456 | -0.048 |
| 1MNA | O5  | 60 | 0.149  | -0.264 | 0.085  |
| 1MNA | C16 | 61 | 0.29   | -0.275 | 0.062  |
| 1MNA | C30 | 62 | 0.348  | -0.353 | 0.183  |
| 1MNA | H40 | 63 | 0.303  | -0.453 | 0.184  |
| 1MNA | H41 | 64 | 0.455  | -0.367 | 0.169  |
| 1MNA | C31 | 65 | 0.323  | -0.289 | 0.32   |
| 1MNA | H42 | 66 | 0.373  | -0.192 | 0.326  |
| 1MNA | H43 | 67 | 0.363  | -0.353 | 0.398  |
| 1MNA | H44 | 68 | 0.216  | -0.276 | 0.336  |
| 1MNA | C17 | 69 | 0.345  | -0.13  | 0.052  |
| 1MNA | H18 | 70 | 0.301  | -0.074 | 0.135  |
| 1MNA | C18 | 71 | 0.498  | -0.107 | 0.061  |
| 1MNA | H19 | 72 | 0.533  | -0.12  | 0.163  |
| 1MNA | C29 | 73 | 0.587  | -0.189 | -0.034 |
| 1MNA | H37 | 74 | 0.557  | -0.174 | -0.138 |
| 1MNA | H38 | 75 | 0.581  | -0.295 | -0.011 |
| 1MNA | H39 | 76 | 0.691  | -0.158 | -0.023 |
| 1MNA | C19 | 77 | 0.501  | 0.04   | 0.022  |
| 1MNA | H20 | 78 | 0.477  | 0.101  | 0.109  |
| 1MNA | H21 | 79 | 0.598  | 0.071  | -0.019 |
| 1MNA | O6  | 80 | 0.307  | -0.062 | -0.067 |
| 1MNA | C20 | 81 | 0.39   | 0.051  | -0.084 |
| 1MNA | H22 | 82 | 0.435  | 0.041  | -0.183 |
| 1MNA | C21 | 83 | 0.31   | 0.183  | -0.08  |
| 1MNA | H23 | 84 | 0.233  | 0.177  | -0.157 |
| 1MNA | O7  | 85 | 0.248  | 0.194  | 0.048  |
| 1MNA | C25 | 86 | 0.165  | 0.308  | 0.069  |
| 1MNA | O8  | 87 | 0.056  | 0.308  | -0.021 |
| 1MNA | H30 | 88 | 0.033  | 0.216  | -0.04  |
| 1MNA | C26 | 89 | 0.109  | 0.294  | 0.212  |
| 1MNA | H28 | 90 | 0.191  | 0.304  | 0.283  |
| 1MNA | H29 | 91 | 0.036  | 0.373  | 0.23   |
| 1MNA | O9  | 92 | 0.047  | 0.168  | 0.23   |
| 1MNA | H51 | 93 | 0.106  | 0.101  | 0.192  |

|      |     |     |       |       |        |
|------|-----|-----|-------|-------|--------|
| 1MNA | C24 | 94  | 0.25  | 0.436 | 0.052  |
| 1MNA | H27 | 95  | 0.329 | 0.434 | 0.127  |
| 1MNA | C27 | 96  | 0.17  | 0.567 | 0.071  |
| 1MNA | H31 | 97  | 0.236 | 0.652 | 0.056  |
| 1MNA | H32 | 98  | 0.129 | 0.573 | 0.171  |
| 1MNA | H33 | 99  | 0.089 | 0.572 | -0.001 |
| 1MNA | C23 | 100 | 0.316 | 0.436 | -0.087 |
| 1MNA | H25 | 101 | 0.382 | 0.523 | -0.095 |
| 1MNA | H26 | 102 | 0.239 | 0.443 | -0.164 |
| 1MNA | C22 | 103 | 0.398 | 0.308 | -0.107 |
| 1MNA | H24 | 104 | 0.48  | 0.309 | -0.035 |
| 1MNA | C28 | 105 | 0.458 | 0.309 | -0.249 |
| 1MNA | H34 | 106 | 0.378 | 0.301 | -0.323 |
| 1MNA | H35 | 107 | 0.528 | 0.226 | -0.261 |
| 1MNA | H36 | 108 | 0.513 | 0.402 | -0.265 |

**Table S2.** Force field parameters of Monensinate anion.

| Atom number | Atom type | Charge   | System numbering |
|-------------|-----------|----------|------------------|
| O1          | opls_272  | -0.75932 | 1                |
| C1          | opls_271  | 0.767858 | 2                |
| O2          | opls_272  | -0.75932 | 3                |
| C2          | opls_275  | 0.011776 | 4                |
| H1          | opls_140  | -0.01005 | 5                |
| C36         | opls_135  | -0.03248 | 6                |
| H59         | opls_140  | -0.01009 | 7                |
| H60         | opls_140  | -0.01009 | 8                |
| H61         | opls_140  | -0.01009 | 9                |
| C3          | opls_183  | -5.2E-05 | 10               |
| H2          | opls_185  | 0.062316 | 11               |
| O11         | opls_180  | -0.37608 | 12               |
| C35         | opls_181  | 0.01222  | 13               |
| H56         | opls_185  | 0.054062 | 14               |
| H57         | opls_185  | 0.054062 | 15               |
| H58         | opls_185  | 0.054062 | 16               |
| C4          | opls_137  | -0.01237 | 17               |
| H3          | opls_140  | 0.023877 | 18               |
| C34         | opls_135  | -0.01507 | 19               |
| H53         | opls_140  | -0.01507 | 20               |
| H54         | opls_140  | -0.01507 | 21               |
| H55         | opls_140  | -0.01507 | 22               |
| C5          | opls_183  | -0.03804 | 23               |
| H4          | opls_185  | 0.113645 | 24               |
| C6          | opls_137  | 0.005747 | 25               |
| H5          | opls_140  | 0.041605 | 26               |
| C33         | opls_135  | -0.03634 | 27               |
| H48         | opls_140  | 0.017833 | 28               |



---

|     |          |          |    |
|-----|----------|----------|----|
| H49 | opls_140 | 0.017833 | 29 |
| H50 | opls_140 | 0.017833 | 30 |
| C7  | opls_158 | -0.00614 | 31 |
| H6  | opls_156 | 0.118947 | 32 |
| O10 | opls_154 | -0.52261 | 33 |
| H52 | opls_155 | 0.269562 | 34 |
| C8  | opls_136 | -0.05577 | 35 |
| H7  | opls_140 | 0.062372 | 36 |
| H8  | opls_140 | 0.062372 | 37 |
| O3  | opls_186 | -0.1705  | 38 |
| C9  | opls_197 | 0.011581 | 39 |
| C10 | opls_136 | -0.06121 | 40 |
| H9  | opls_140 | 0.056471 | 41 |
| H10 | opls_140 | 0.056471 | 42 |
| C11 | opls_136 | -0.0362  | 43 |
| H11 | opls_140 | 0.052219 | 44 |
| H12 | opls_140 | 0.052219 | 45 |
| O4  | opls_186 | -0.08729 | 46 |
| C12 | opls_184 | 0.02996  | 47 |
| C32 | opls_135 | -0.06965 | 48 |
| H45 | opls_140 | 0.032349 | 49 |
| H46 | opls_140 | 0.032349 | 50 |
| H47 | opls_140 | 0.032349 | 51 |
| C13 | opls_183 | -0.00168 | 52 |
| H13 | opls_185 | 0.072529 | 53 |
| C14 | opls_136 | -0.01932 | 54 |
| H14 | opls_140 | 0.040879 | 55 |
| H15 | opls_140 | 0.040879 | 56 |
| C15 | opls_136 | -0.03757 | 57 |
| H16 | opls_140 | 0.045105 | 58 |
| H17 | opls_140 | 0.045105 | 59 |
| O5  | opls_180 | -0.24735 | 60 |
| C16 | opls_183 | -0.00586 | 61 |
| C30 | opls_136 | 0.011472 | 62 |
| H40 | opls_140 | 0.029762 | 63 |
| H41 | opls_140 | 0.029762 | 64 |
| C31 | opls_135 | -0.03578 | 65 |
| H42 | opls_140 | 0.012174 | 66 |
| H43 | opls_140 | 0.012174 | 67 |
| H44 | opls_140 | 0.012174 | 68 |
| C17 | opls_183 | -0.00825 | 69 |
| H18 | opls_185 | 0.130474 | 70 |
| C18 | opls_137 | 0.002691 | 71 |
| H19 | opls_140 | 0.048977 | 72 |
| C29 | opls_135 | -0.04092 | 73 |
| H37 | opls_140 | 0.006976 | 74 |
| H38 | opls_140 | 0.006976 | 75 |
| H39 | opls_140 | 0.006976 | 76 |

|     |          |          |     |
|-----|----------|----------|-----|
| C19 | opls_136 | -0.00354 | 77  |
| H20 | opls_140 | 0.040868 | 78  |
| H21 | opls_140 | 0.040868 | 79  |
| O6  | opls_180 | -0.32153 | 80  |
| C20 | opls_183 | 0.011997 | 81  |
| H22 | opls_185 | 0.072994 | 82  |
| C21 | opls_183 | -0.03497 | 83  |
| H23 | opls_185 | 0.078201 | 84  |
| O7  | opls_180 | -0.14321 | 85  |
| C25 | opls_198 | 0.085386 | 86  |
| O8  | opls_187 | -0.5059  | 87  |
| H30 | opls_188 | 0.394475 | 88  |
| C26 | opls_157 | 0.023082 | 89  |
| H28 | opls_156 | 0.091    | 90  |
| H29 | opls_156 | 0.091    | 91  |
| O9  | opls_154 | -0.63279 | 92  |
| H51 | opls_155 | 0.436206 | 93  |
| C24 | opls_137 | 0.011717 | 94  |
| H27 | opls_140 | 0.024966 | 95  |
| C27 | opls_135 | -0.07169 | 96  |
| H31 | opls_140 | 0.023726 | 97  |
| H32 | opls_140 | 0.023726 | 98  |
| H33 | opls_140 | 0.023726 | 99  |
| C23 | opls_136 | -0.02672 | 100 |
| H25 | opls_140 | 0.040197 | 101 |
| H26 | opls_140 | 0.040197 | 102 |
| C22 | opls_137 | 0.020264 | 103 |
| H24 | opls_140 | 0.036147 | 104 |
| C28 | opls_135 | -0.1118  | 105 |
| H34 | opls_140 | 0.027687 | 106 |
| H35 | opls_140 | 0.027687 | 107 |
| H36 | opls_140 | 0.027687 | 108 |

**Table S3.** Coordinates of Salinomycin anion.

| Residue name | Atom number | System numbering | x     | y     | z     |
|--------------|-------------|------------------|-------|-------|-------|
| 1SLA         | O1          | 1                | 1.248 | 0.772 | 1.166 |
| 1SLA         | C1          | 2                | 1.183 | 0.678 | 1.207 |
| 1SLA         | O2          | 3                | 1.208 | 0.553 | 1.17  |
| 1SLA         | C2          | 4                | 1.069 | 0.69  | 1.304 |
| 1SLA         | H1          | 5                | 1.064 | 0.783 | 1.336 |
| 1SLA         | C41         | 6                | 1.091 | 0.598 | 1.423 |
| 1SLA         | H65         | 7                | 1.016 | 0.606 | 1.484 |
| 1SLA         | H66         | 8                | 1.093 | 0.506 | 1.392 |
| 1SLA         | C42         | 9                | 1.217 | 0.625 | 1.499 |
| 1SLA         | H67         | 10               | 1.293 | 0.614 | 1.441 |
| 1SLA         | H68         | 11               | 1.225 | 0.563 | 1.572 |

---

|      |     |    |       |       |       |
|------|-----|----|-------|-------|-------|
| 1SLA | H69 | 12 | 1.215 | 0.715 | 1.533 |
| 1SLA | C3  | 13 | 0.938 | 0.656 | 1.232 |
| 1SLA | H2  | 14 | 0.929 | 0.559 | 1.232 |
| 1SLA | O3  | 15 | 0.938 | 0.698 | 1.096 |
| 1SLA | C4  | 16 | 0.815 | 0.711 | 1.306 |
| 1SLA | H3  | 17 | 0.736 | 0.664 | 1.276 |
| 1SLA | H4  | 18 | 0.825 | 0.695 | 1.401 |
| 1SLA | C5  | 19 | 0.796 | 0.859 | 1.282 |
| 1SLA | H5  | 20 | 0.869 | 0.908 | 1.324 |
| 1SLA | H6  | 21 | 0.713 | 0.888 | 1.323 |
| 1SLA | C6  | 22 | 0.793 | 0.888 | 1.132 |
| 1SLA | H7  | 23 | 0.788 | 0.985 | 1.12  |
| 1SLA | C40 | 24 | 0.669 | 0.825 | 1.065 |
| 1SLA | H62 | 25 | 0.65  | 0.872 | 0.984 |
| 1SLA | H63 | 26 | 0.594 | 0.831 | 1.125 |
| 1SLA | H64 | 27 | 0.687 | 0.733 | 1.046 |
| 1SLA | C7  | 28 | 0.924 | 0.84  | 1.071 |
| 1SLA | H8  | 29 | 0.998 | 0.887 | 1.114 |
| 1SLA | C8  | 30 | 0.935 | 0.854 | 0.921 |
| 1SLA | H9  | 31 | 0.86  | 0.804 | 0.881 |
| 1SLA | C39 | 32 | 0.921 | 1     | 0.877 |
| 1SLA | H59 | 33 | 0.988 | 1.053 | 0.922 |
| 1SLA | H60 | 34 | 0.834 | 1.033 | 0.9   |
| 1SLA | H61 | 35 | 0.934 | 1.007 | 0.783 |
| 1SLA | C9  | 36 | 1.064 | 0.792 | 0.869 |
| 1SLA | H10 | 37 | 1.074 | 0.702 | 0.908 |
| 1SLA | O4  | 38 | 1.179 | 0.87  | 0.907 |
| 1SLA | H11 | 39 | 1.207 | 0.843 | 0.98  |
| 1SLA | C10 | 40 | 1.074 | 0.779 | 0.717 |
| 1SLA | H12 | 41 | 1.09  | 0.868 | 0.679 |
| 1SLA | C38 | 42 | 0.948 | 0.719 | 0.654 |
| 1SLA | H56 | 43 | 0.964 | 0.702 | 0.561 |
| 1SLA | H57 | 44 | 0.875 | 0.782 | 0.663 |
| 1SLA | H58 | 45 | 0.925 | 0.637 | 0.699 |
| 1SLA | C11 | 46 | 1.186 | 0.687 | 0.677 |
| 1SLA | O5  | 47 | 1.22  | 0.592 | 0.745 |
| 1SLA | C12 | 48 | 1.252 | 0.711 | 0.541 |
| 1SLA | H13 | 49 | 1.182 | 0.745 | 0.482 |
| 1SLA | C36 | 50 | 1.301 | 0.58  | 0.479 |
| 1SLA | H51 | 51 | 1.365 | 0.6   | 0.409 |
| 1SLA | H52 | 52 | 1.345 | 0.527 | 0.547 |
| 1SLA | C37 | 53 | 1.187 | 0.498 | 0.42  |
| 1SLA | H53 | 54 | 1.13  | 0.467 | 0.49  |
| 1SLA | H54 | 55 | 1.223 | 0.423 | 0.372 |
| 1SLA | H55 | 56 | 1.136 | 0.553 | 0.36  |
| 1SLA | C13 | 57 | 1.36  | 0.821 | 0.551 |
| 1SLA | H14 | 58 | 1.421 | 0.811 | 0.475 |
| 1SLA | O6  | 59 | 1.285 | 0.943 | 0.535 |

---

|      |     |     |       |       |        |
|------|-----|-----|-------|-------|--------|
| 1SLA | C14 | 60  | 1.442 | 0.823 | 0.678  |
| 1SLA | H15 | 61  | 1.381 | 0.825 | 0.755  |
| 1SLA | C35 | 62  | 1.533 | 0.7   | 0.689  |
| 1SLA | H48 | 63  | 1.479 | 0.621 | 0.699  |
| 1SLA | H49 | 64  | 1.59  | 0.709 | 0.766  |
| 1SLA | H50 | 65  | 1.587 | 0.693 | 0.61   |
| 1SLA | C15 | 66  | 1.526 | 0.95  | 0.68   |
| 1SLA | H16 | 67  | 1.575 | 0.955 | 0.763  |
| 1SLA | H17 | 68  | 1.59  | 0.947 | 0.607  |
| 1SLA | C16 | 69  | 1.439 | 1.074 | 0.665  |
| 1SLA | H18 | 70  | 1.376 | 1.075 | 0.74   |
| 1SLA | C34 | 71  | 1.522 | 1.203 | 0.672  |
| 1SLA | H45 | 72  | 1.564 | 1.21  | 0.758  |
| 1SLA | H46 | 73  | 1.464 | 1.279 | 0.659  |
| 1SLA | H47 | 74  | 1.589 | 1.202 | 0.604  |
| 1SLA | C17 | 75  | 1.359 | 1.066 | 0.535  |
| 1SLA | O7  | 76  | 1.26  | 1.166 | 0.544  |
| 1SLA | C18 | 77  | 1.442 | 1.082 | 0.412  |
| 1SLA | H19 | 78  | 1.507 | 1.018 | 0.394  |
| 1SLA | C19 | 79  | 1.428 | 1.182 | 0.328  |
| 1SLA | H20 | 80  | 1.486 | 1.189 | 0.256  |
| 1SLA | C20 | 81  | 1.324 | 1.284 | 0.346  |
| 1SLA | H21 | 82  | 1.361 | 1.358 | 0.398  |
| 1SLA | O8  | 83  | 1.278 | 1.336 | 0.222  |
| 1SLA | H22 | 84  | 1.227 | 1.282 | 0.187  |
| 1SLA | C21 | 85  | 1.21  | 1.223 | 0.425  |
| 1SLA | O9  | 86  | 1.15  | 1.13  | 0.34   |
| 1SLA | C22 | 87  | 1.099 | 1.322 | 0.466  |
| 1SLA | H23 | 88  | 1.103 | 1.34  | 0.562  |
| 1SLA | H24 | 89  | 1.108 | 1.406 | 0.418  |
| 1SLA | C23 | 90  | 0.973 | 1.254 | 0.43   |
| 1SLA | H25 | 91  | 0.916 | 1.315 | 0.381  |
| 1SLA | H26 | 92  | 0.926 | 1.228 | 0.511  |
| 1SLA | C24 | 93  | 1.004 | 1.132 | 0.346  |
| 1SLA | C33 | 94  | 0.96  | 1.002 | 0.411  |
| 1SLA | H42 | 95  | 0.864 | 1.002 | 0.419  |
| 1SLA | H43 | 96  | 0.999 | 0.995 | 0.498  |
| 1SLA | H44 | 97  | 0.988 | 0.928 | 0.357  |
| 1SLA | C25 | 98  | 0.958 | 1.141 | 0.203  |
| 1SLA | H27 | 99  | 0.996 | 1.066 | 0.153  |
| 1SLA | C26 | 100 | 0.807 | 1.139 | 0.186  |
| 1SLA | H28 | 101 | 0.767 | 1.208 | 0.242  |
| 1SLA | H29 | 102 | 0.772 | 1.053 | 0.215  |
| 1SLA | C27 | 103 | 0.768 | 1.163 | 0.041  |
| 1SLA | H30 | 104 | 0.798 | 1.088 | -0.013 |
| 1SLA | H31 | 105 | 0.672 | 1.169 | 0.034  |
| 1SLA | C28 | 106 | 0.831 | 1.29  | -0.014 |
| 1SLA | O11 | 107 | 0.784 | 1.403 | 0.059  |

|      |     |     |       |       |        |
|------|-----|-----|-------|-------|--------|
| 1SLA | H36 | 108 | 0.702 | 1.405 | 0.058  |
| 1SLA | C31 | 109 | 0.797 | 1.305 | -0.161 |
| 1SLA | H37 | 110 | 0.7   | 1.304 | -0.171 |
| 1SLA | H38 | 111 | 0.832 | 1.229 | -0.209 |
| 1SLA | C32 | 112 | 0.851 | 1.434 | -0.228 |
| 1SLA | H39 | 113 | 0.817 | 1.51  | -0.181 |
| 1SLA | H40 | 114 | 0.822 | 1.437 | -0.319 |
| 1SLA | H41 | 115 | 0.947 | 1.434 | -0.224 |
| 1SLA | C29 | 116 | 0.983 | 1.288 | 0.01   |
| 1SLA | H32 | 117 | 1.016 | 1.378 | -0.01  |
| 1SLA | C30 | 118 | 1.058 | 1.191 | -0.078 |
| 1SLA | H33 | 119 | 1.148 | 1.181 | -0.045 |
| 1SLA | H34 | 120 | 1.061 | 1.225 | -0.168 |
| 1SLA | H35 | 121 | 1.014 | 1.106 | -0.078 |
| 1SLA | O10 | 122 | 1.012 | 1.262 | 0.15   |

**Table S4.** Force field parameters of Monensinate anion.

| Atom number | Atom type | Charge   | System numbering |
|-------------|-----------|----------|------------------|
| O1          | opls_272  | -0.77241 | 1                |
| C1          | opls_271  | 0.752127 | 2                |
| O2          | opls_272  | -0.77241 | 3                |
| C2          | opls_275  | 0.010986 | 4                |
| H1          | opls_140  | -0.01064 | 5                |
| C41         | opls_136  | 0.021543 | 6                |
| H65         | opls_140  | -0.00345 | 7                |
| H66         | opls_140  | -0.00345 | 8                |
| C42         | opls_135  | -0.03829 | 9                |
| H67         | opls_140  | -0.01281 | 10               |
| H68         | opls_140  | -0.01281 | 11               |
| H69         | opls_140  | -0.01281 | 12               |
| C3          | opls_183  | 0.037095 | 13               |
| H2          | opls_185  | 0.030142 | 14               |
| O3          | opls_180  | -0.20186 | 15               |
| C4          | opls_136  | -0.01487 | 16               |
| H3          | opls_140  | 0.030084 | 17               |
| H4          | opls_140  | 0.030084 | 18               |
| C5          | opls_136  | -0.01398 | 19               |
| H5          | opls_140  | -0.00716 | 20               |
| H6          | opls_140  | -0.00716 | 21               |
| C6          | opls_137  | 0.029097 | 22               |
| H7          | opls_140  | 0.06938  | 23               |
| C40         | opls_135  | -0.13074 | 24               |
| H62         | opls_140  | 0.021503 | 25               |
| H63         | opls_140  | 0.021503 | 26               |
| H64         | opls_140  | 0.021503 | 27               |
| C7          | opls_183  | -0.12583 | 28               |

---

|     |          |          |    |
|-----|----------|----------|----|
| H8  | opls_185 | 0.065625 | 29 |
| C8  | opls_137 | 0.023869 | 30 |
| H9  | opls_140 | -0.01505 | 31 |
| C39 | opls_135 | -0.10723 | 32 |
| H59 | opls_140 | 0.029155 | 33 |
| H60 | opls_140 | 0.029155 | 34 |
| H61 | opls_140 | 0.029155 | 35 |
| C9  | opls_158 | 0.006664 | 36 |
| H10 | opls_140 | 0.129822 | 37 |
| O4  | opls_154 | -0.49483 | 38 |
| H11 | opls_155 | 0.358849 | 39 |
| C10 | opls_137 | 0.055634 | 40 |
| H12 | opls_140 | 0.113075 | 41 |
| C38 | opls_135 | -1.16238 | 42 |
| H56 | opls_140 | 0.334    | 43 |
| H57 | opls_140 | 0.334    | 44 |
| H58 | opls_140 | 0.334    | 45 |
| C11 | opls_280 | 0.3848   | 46 |
| O5  | opls_281 | -0.43285 | 47 |
| C12 | opls_137 | -0.03204 | 48 |
| H13 | opls_140 | 0.040012 | 49 |
| C36 | opls_136 | 0.014232 | 50 |
| H51 | opls_140 | 0.016055 | 51 |
| H52 | opls_140 | 0.016055 | 52 |
| C37 | opls_135 | -0.0436  | 53 |
| H53 | opls_140 | 0.013147 | 54 |
| H54 | opls_140 | 0.013147 | 55 |
| H55 | opls_140 | 0.013147 | 56 |
| C13 | opls_183 | -0.03602 | 57 |
| H14 | opls_185 | 0.165285 | 58 |
| O6  | opls_186 | -0.19965 | 59 |
| C14 | opls_137 | -0.00522 | 60 |
| H15 | opls_140 | 0.02111  | 61 |
| C35 | opls_135 | -0.03584 | 62 |
| H48 | opls_140 | 0.012371 | 63 |
| H49 | opls_140 | 0.012371 | 64 |
| H50 | opls_140 | 0.012371 | 65 |
| C15 | opls_137 | -0.01871 | 66 |
| H16 | opls_140 | 0.027201 | 67 |
| H17 | opls_140 | 0.027201 | 68 |
| C16 | opls_137 | -0.01777 | 69 |
| H18 | opls_140 | 0.084283 | 70 |
| C34 | opls_135 | -0.03005 | 71 |
| H45 | opls_140 | 0.008884 | 72 |
| H46 | opls_140 | 0.008884 | 73 |
| H47 | opls_140 | 0.008884 | 74 |
| C17 | opls_197 | -0.0446  | 75 |
| O7  | opls_186 | -0.08797 | 76 |

---

|     |          |          |     |
|-----|----------|----------|-----|
| C18 | opls_142 | -0.16038 | 77  |
| H19 | opls_144 | 0.149807 | 78  |
| C19 | opls_142 | -0.06037 | 79  |
| H20 | opls_144 | 0.114747 | 80  |
| C20 | opls_158 | 0.016851 | 81  |
| H21 | opls_140 | 0.138853 | 82  |
| O8  | opls_154 | -0.5024  | 83  |
| H22 | opls_155 | 0.398825 | 84  |
| C21 | opls_197 | -0.01832 | 85  |
| O9  | opls_186 | -0.19984 | 86  |
| C22 | opls_136 | -0.03608 | 87  |
| H23 | opls_140 | 0.055884 | 88  |
| H24 | opls_140 | 0.055884 | 89  |
| C23 | opls_136 | -0.02335 | 90  |
| H25 | opls_140 | 0.051103 | 91  |
| H26 | opls_140 | 0.051103 | 92  |
| C24 | opls_139 | -0.00214 | 93  |
| C33 | opls_135 | -0.02875 | 94  |
| H42 | opls_140 | 0.028515 | 95  |
| H43 | opls_140 | 0.028515 | 96  |
| H44 | opls_140 | 0.028515 | 97  |
| C25 | opls_183 | -0.02093 | 98  |
| H27 | opls_185 | 0.077924 | 99  |
| C26 | opls_136 | -0.0092  | 100 |
| H28 | opls_140 | 0.036563 | 101 |
| H29 | opls_140 | 0.036563 | 102 |
| C27 | opls_136 | -0.04085 | 103 |
| H30 | opls_140 | 0.031037 | 104 |
| H31 | opls_140 | 0.031037 | 105 |
| C28 | opls_159 | 0.086978 | 106 |
| O11 | opls_154 | -0.51337 | 107 |
| H36 | opls_155 | 0.364558 | 108 |
| C31 | opls_136 | -0.02079 | 109 |
| H37 | opls_140 | 0.035489 | 110 |
| H38 | opls_140 | 0.035489 | 111 |
| C32 | opls_135 | -0.03589 | 112 |
| H39 | opls_140 | 0.015952 | 113 |
| H40 | opls_140 | 0.015952 | 114 |
| H41 | opls_140 | 0.015952 | 115 |
| C29 | opls_183 | -0.02655 | 116 |
| H32 | opls_185 | 0.078993 | 117 |
| C30 | opls_135 | -0.04185 | 118 |
| H33 | opls_140 | 0.02901  | 119 |
| H34 | opls_140 | 0.02901  | 120 |
| H35 | opls_140 | 0.02901  | 121 |
| O10 | opls_180 | -0.24009 | 122 |

---
